# Supplementary material for: Hematopoietic Origin of Murine Lung Fibroblasts
Source: Hindawi journal article supplement (doi:10.1155/2015/159713), 2015-01-01

**DIC****HO****GFP****CD45****DDR2****Merged****Merged (Inset)**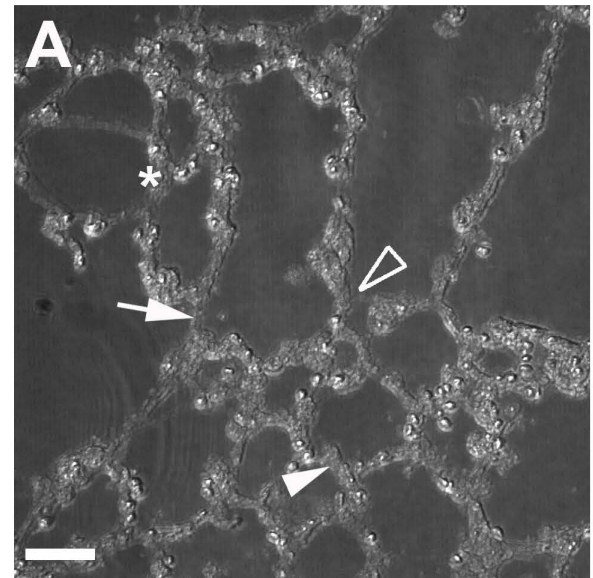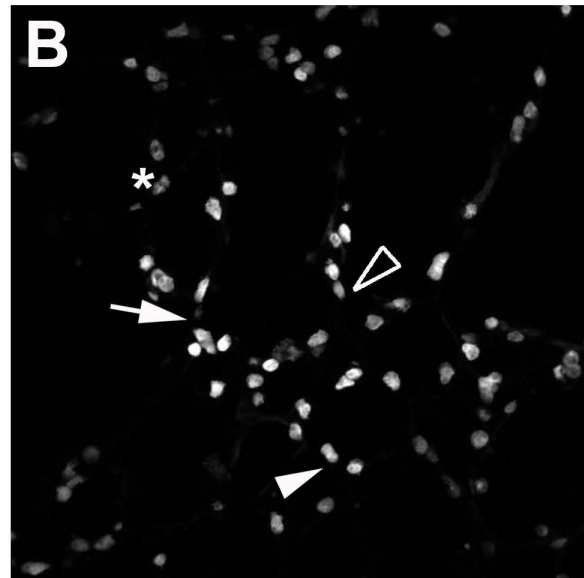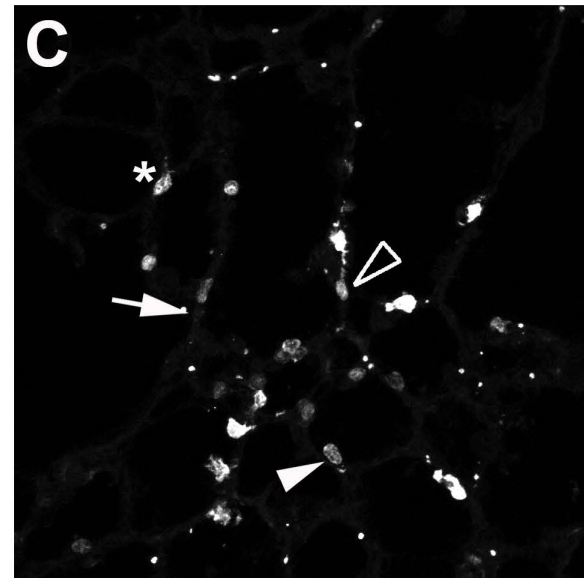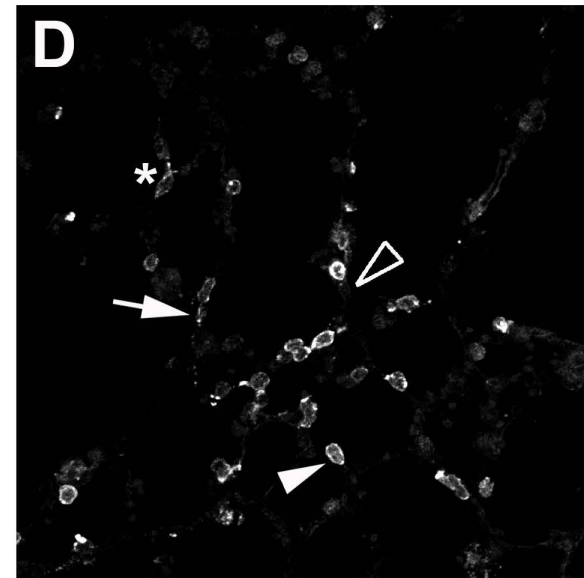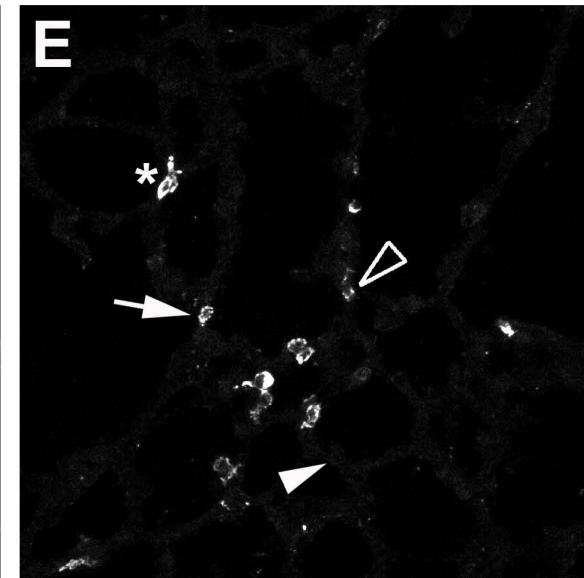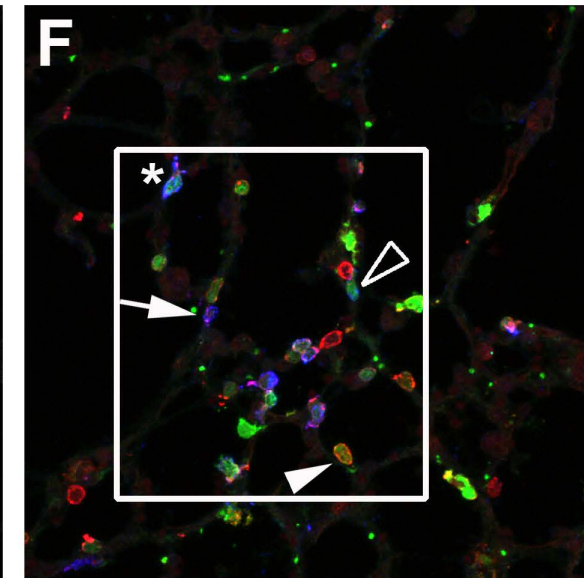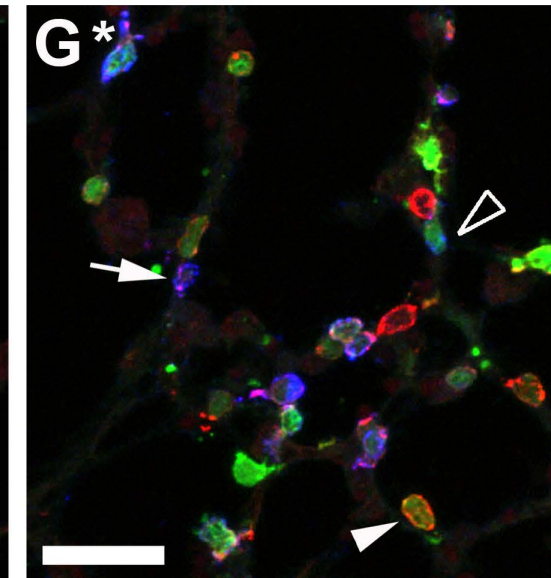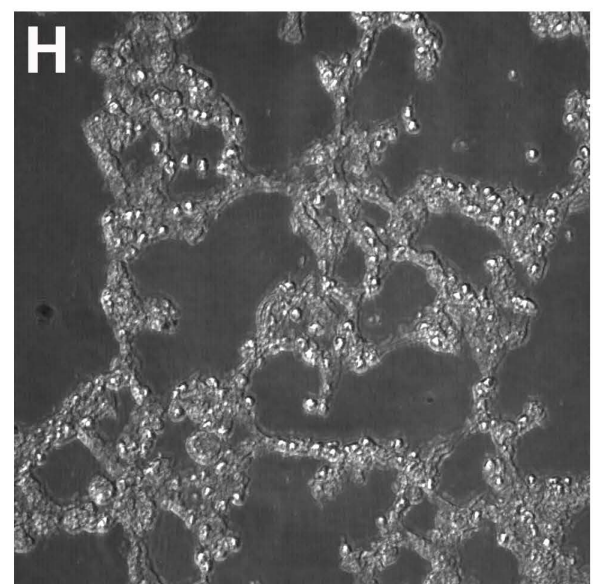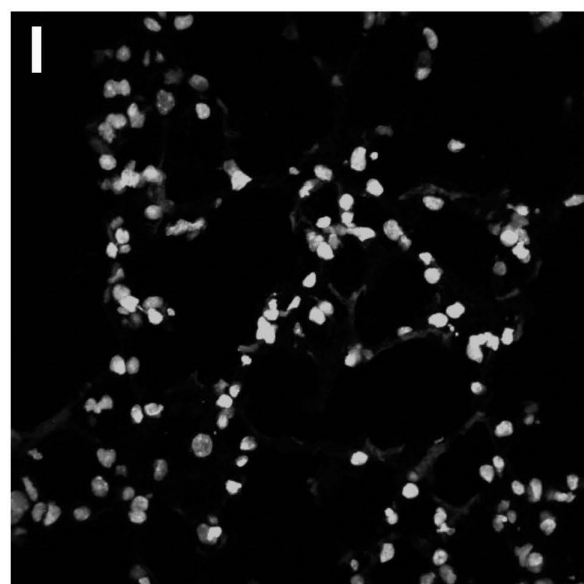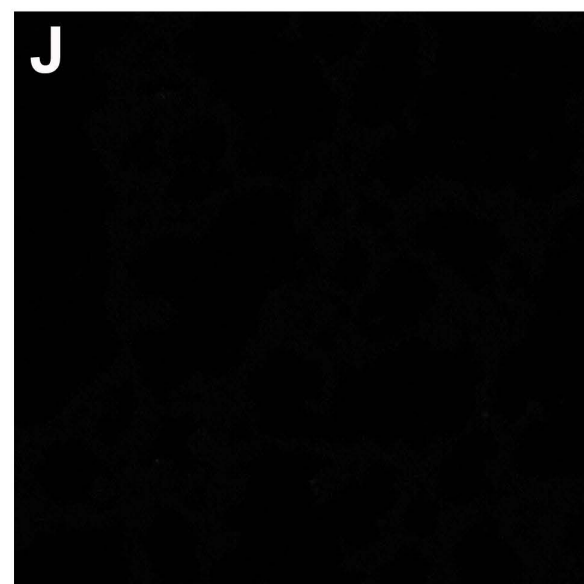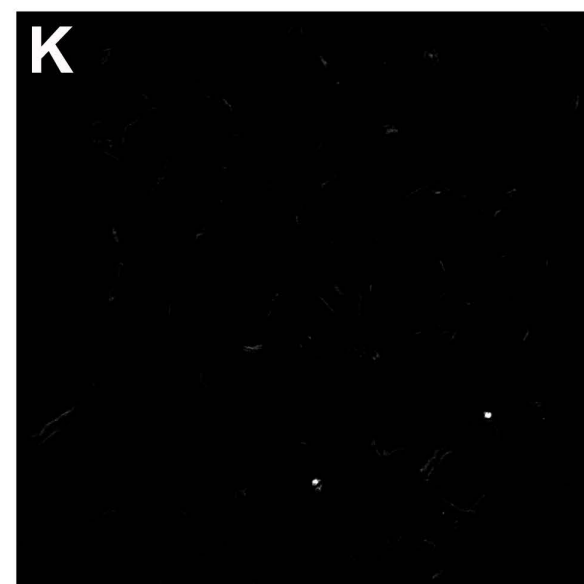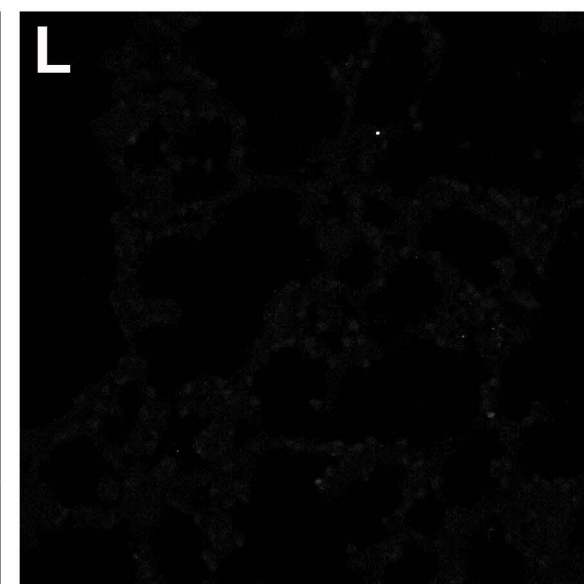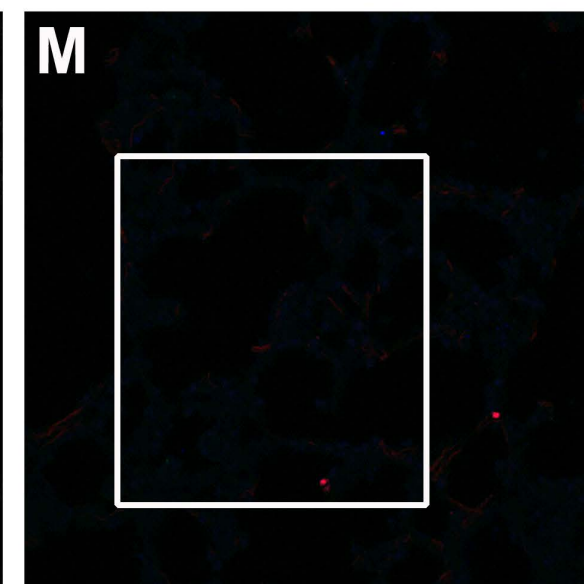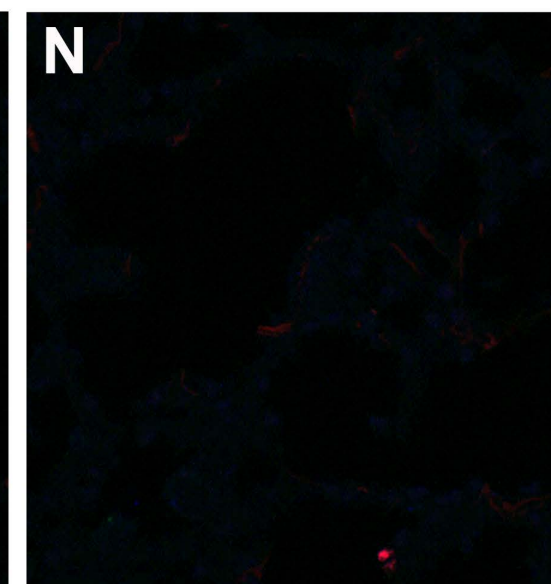



**DIC****HO****GFP****COL I****DDR2****Merged****Merged (Inset)**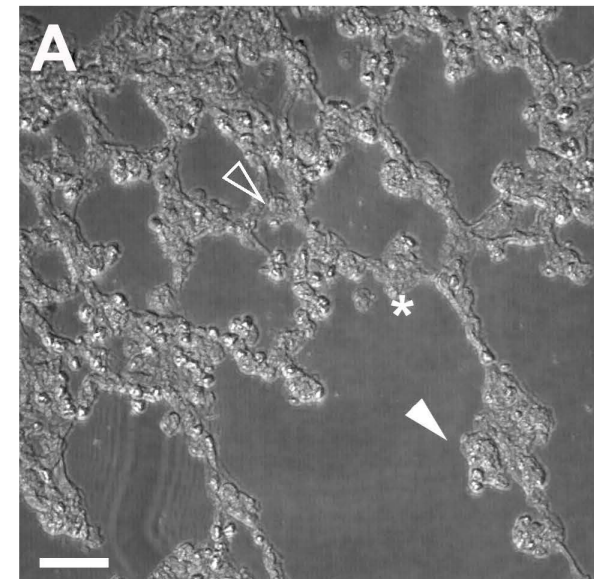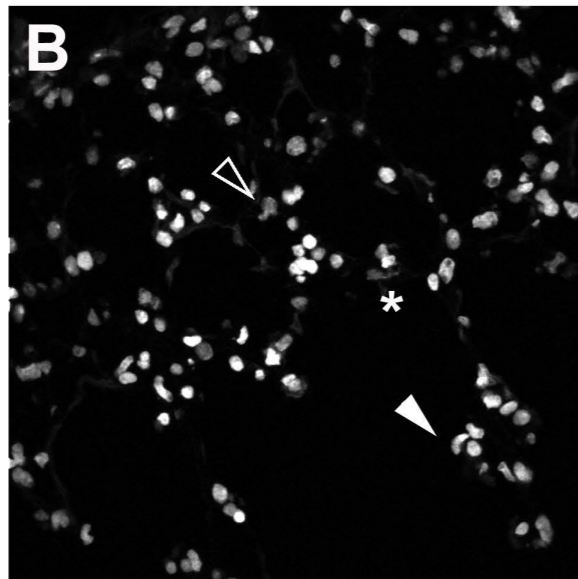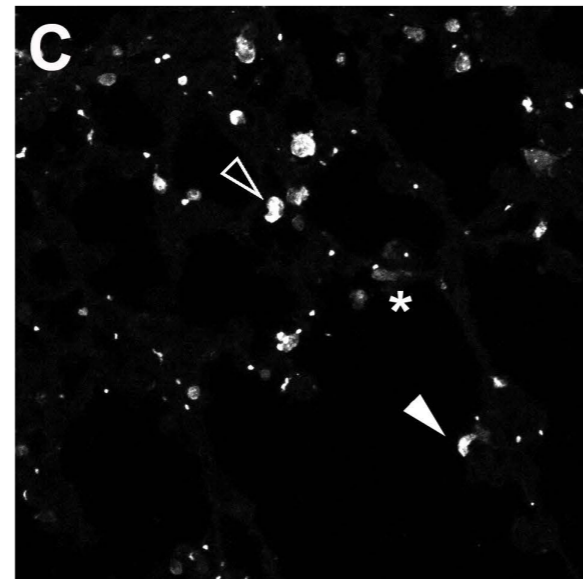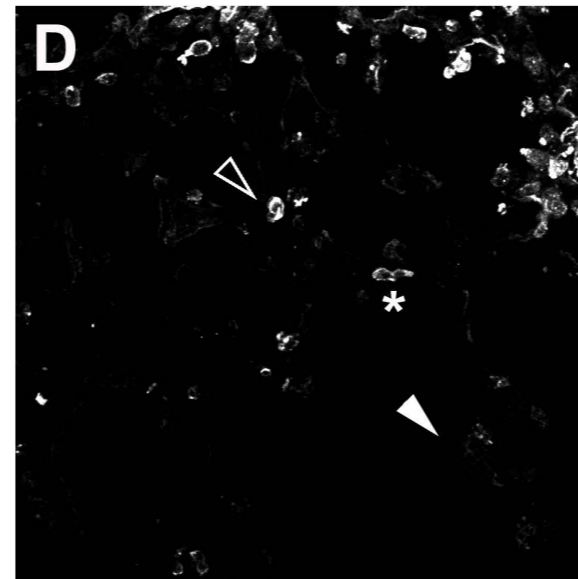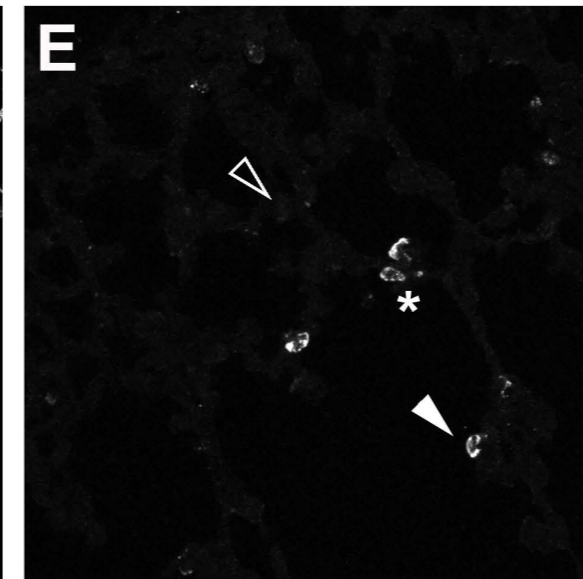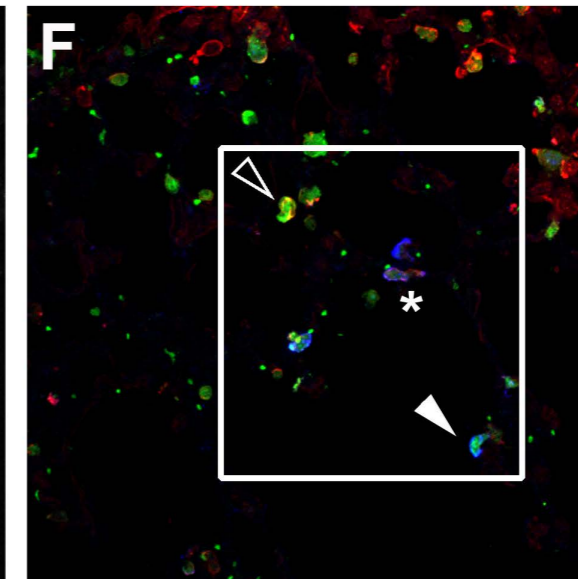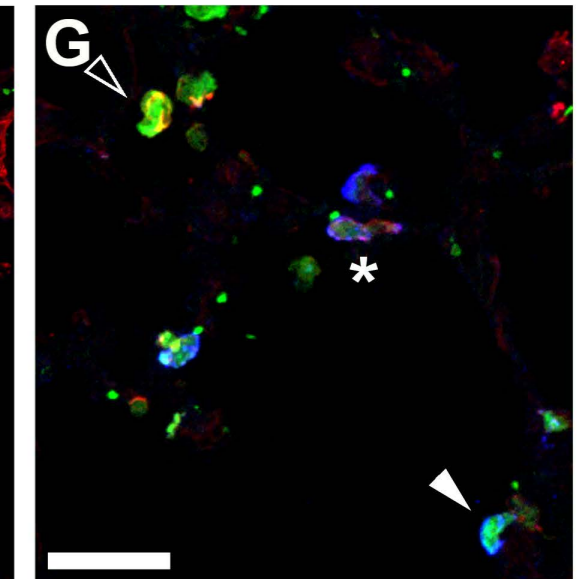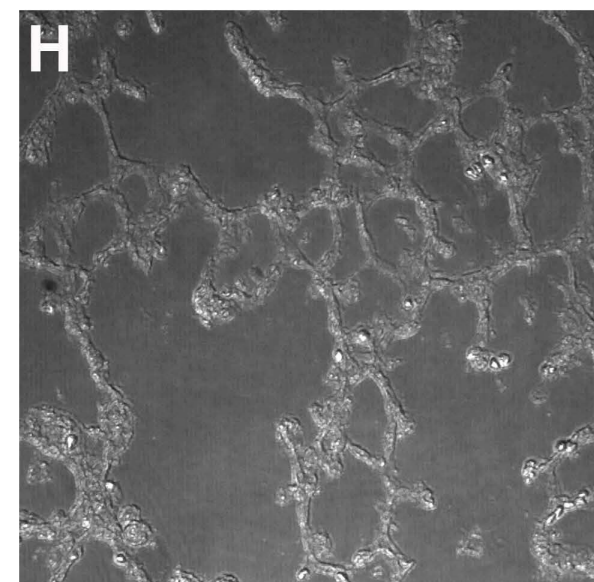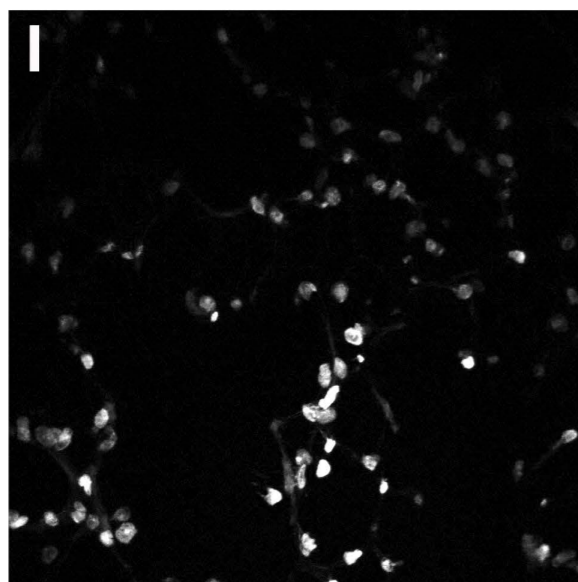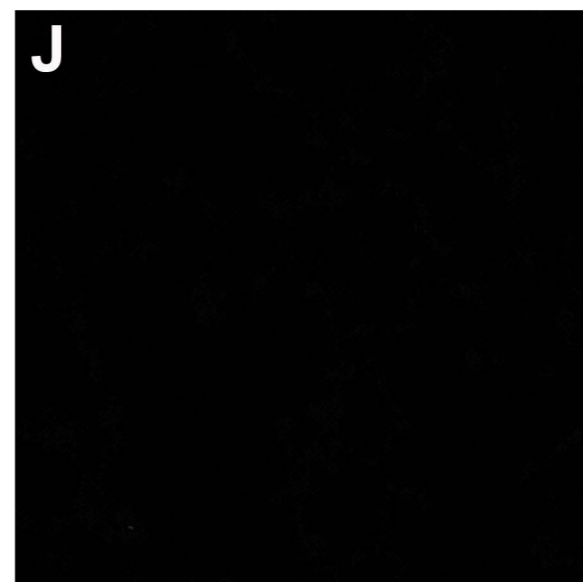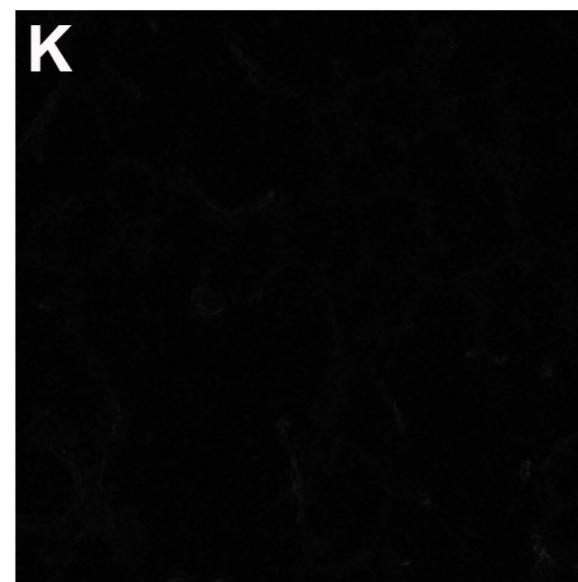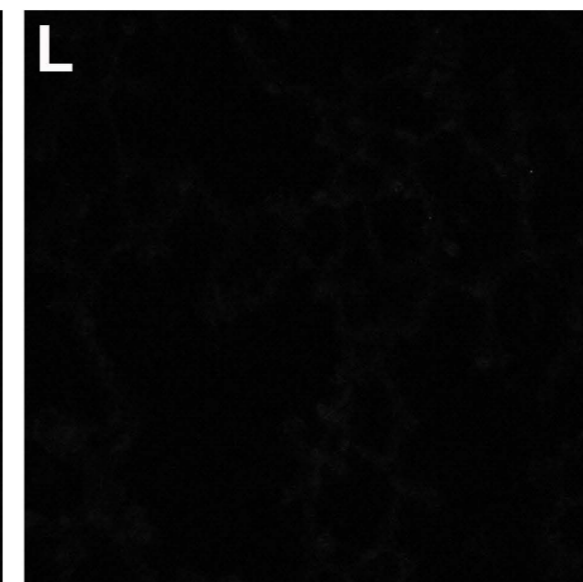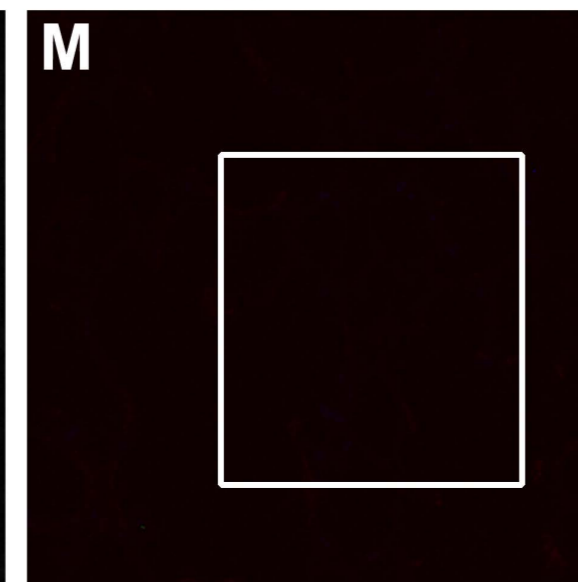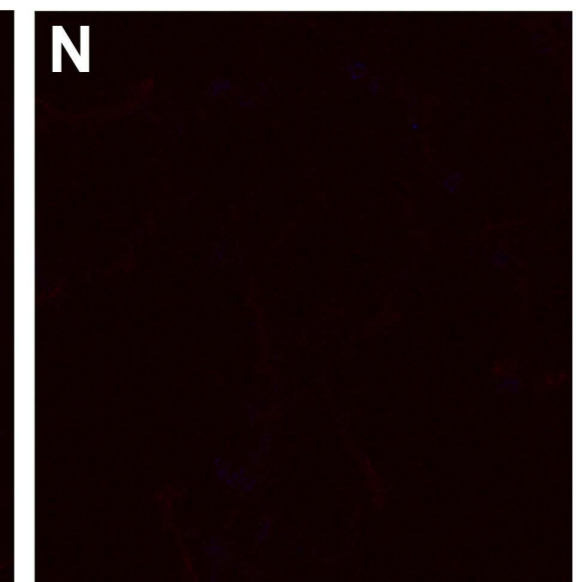

**DIC****HO****GFP****COL I****DDR2****Merged****Merged (Inset)**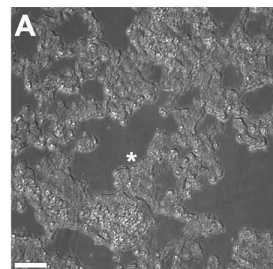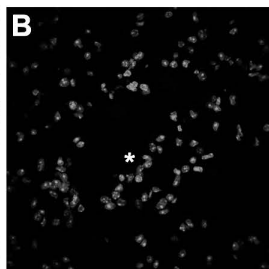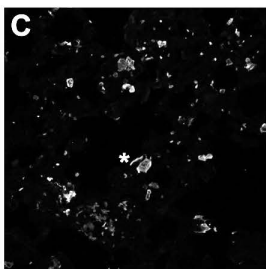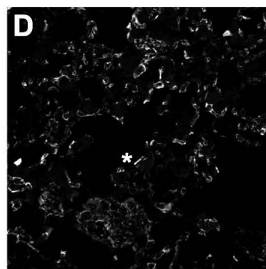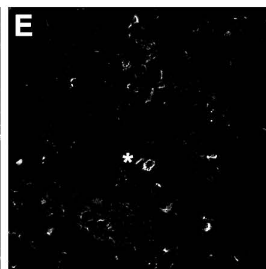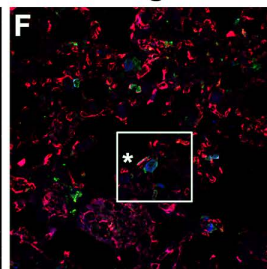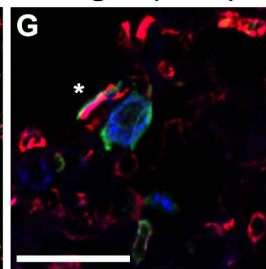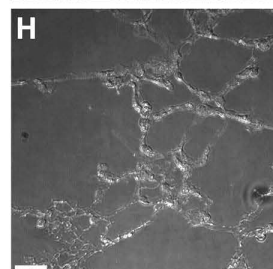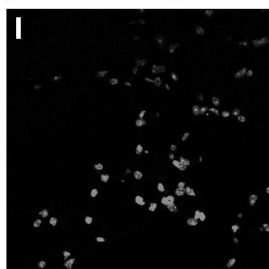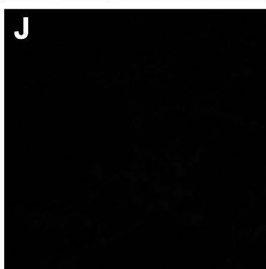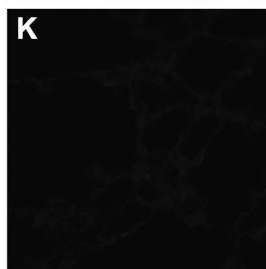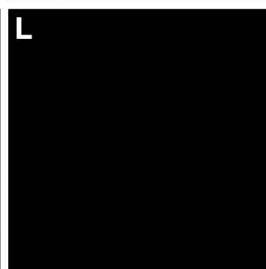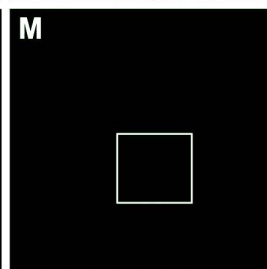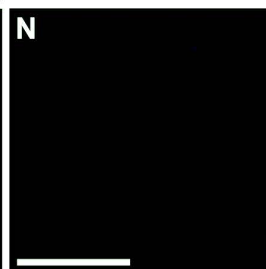



**DIC****HO****CD45****DDR2****Merged****Merged (Inset)**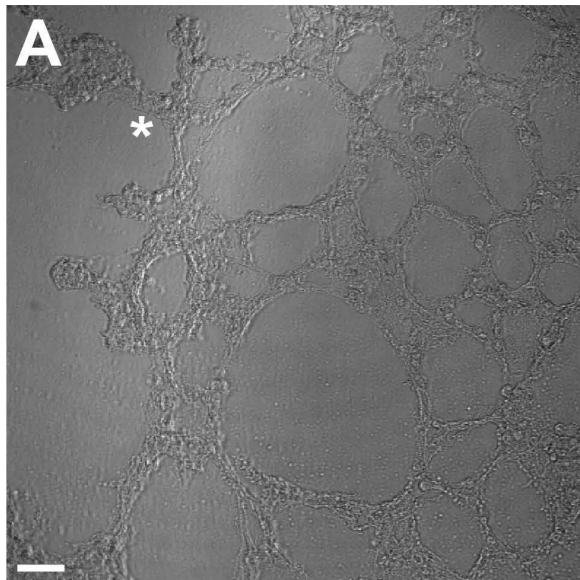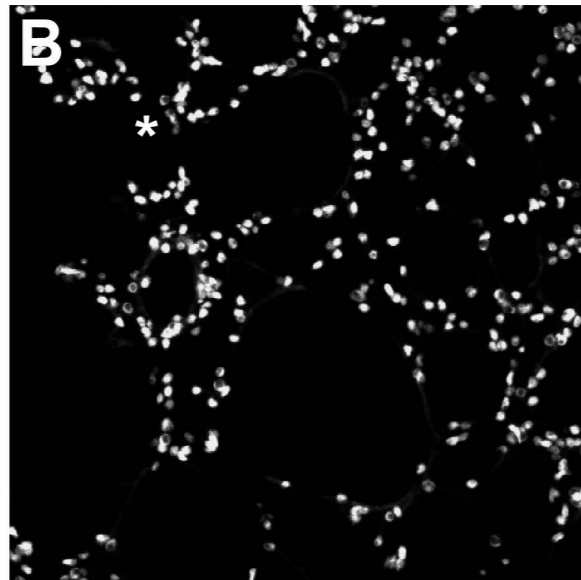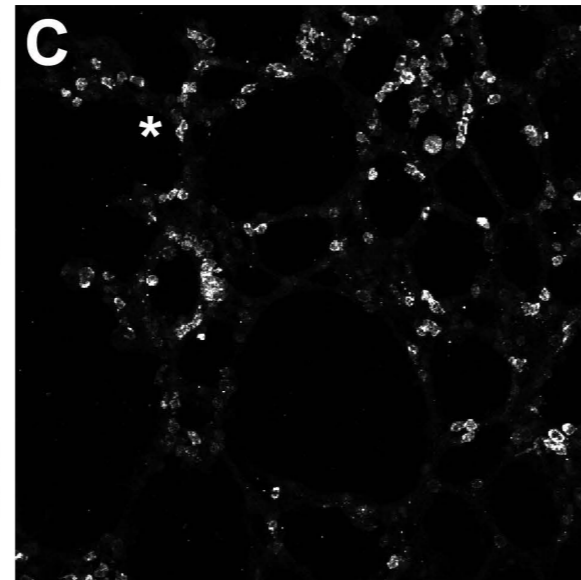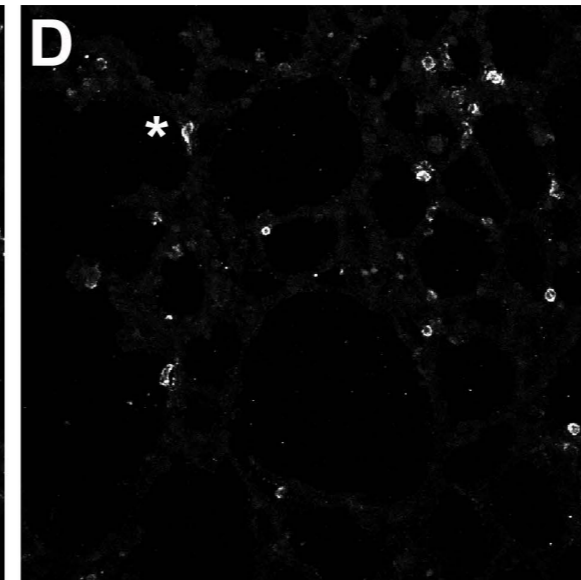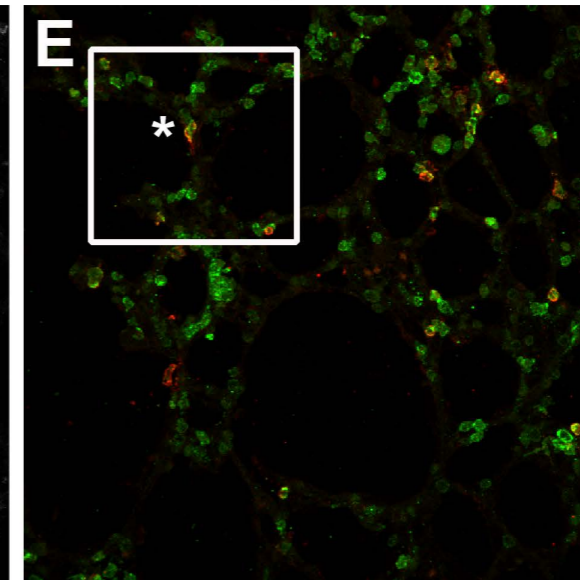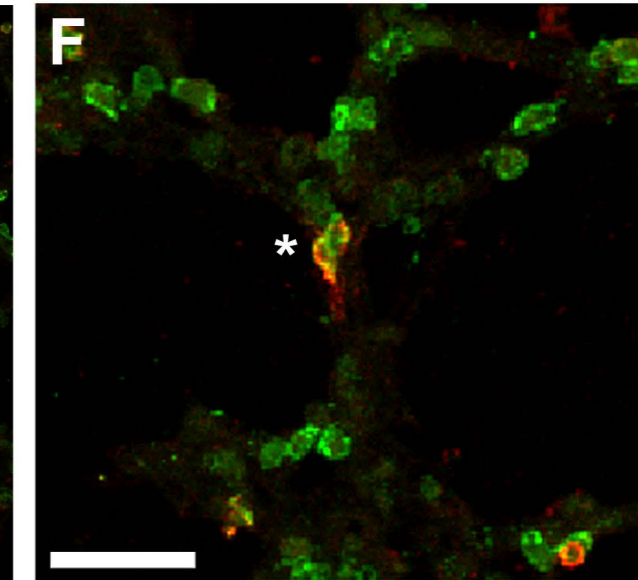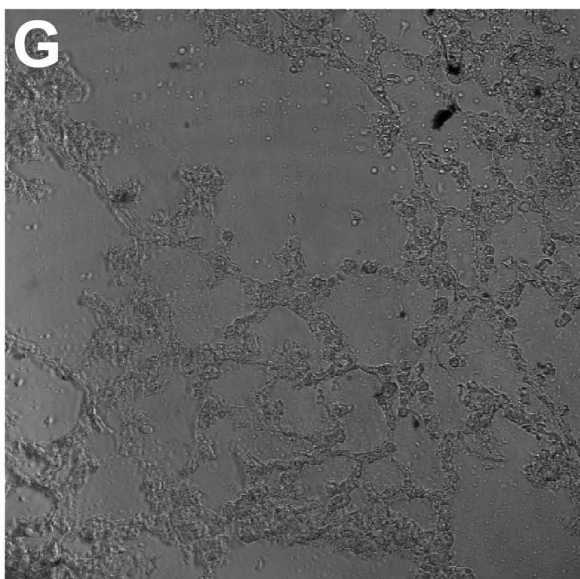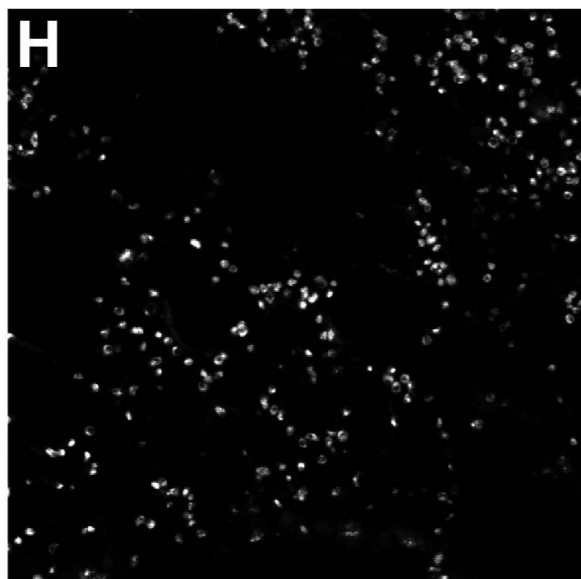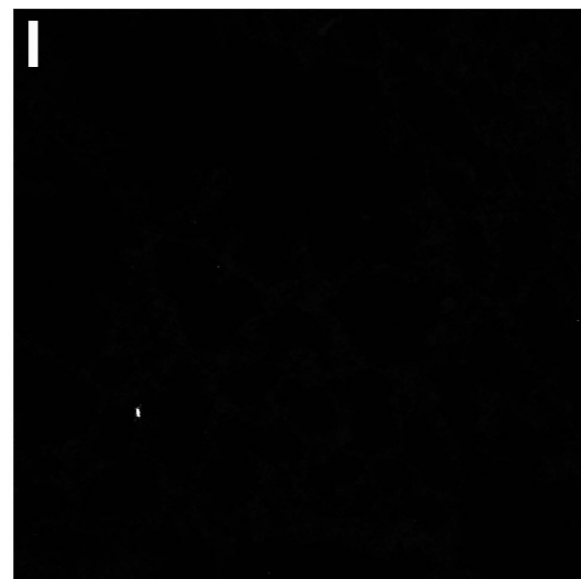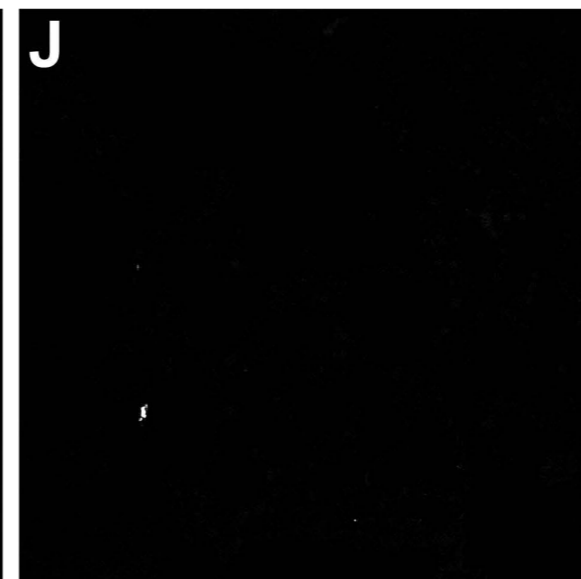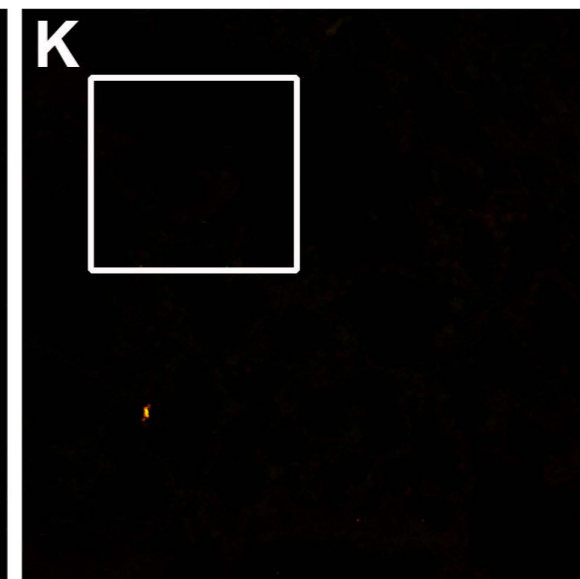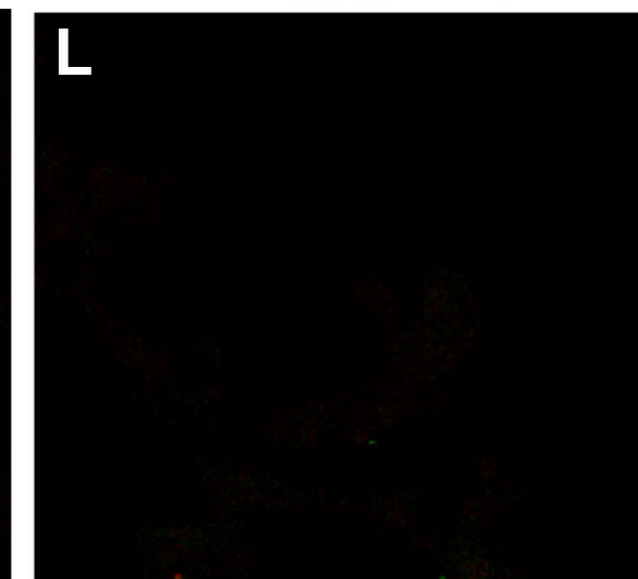

Supplement: f1 [file 159713.f1.pdf]
